# Supplementary material for: Selective nanomolar electrochemical detection of serotonin, dopamine and tryptophan using TiO2/RGO/CPE – influence of reducing agents
Source: Royal Society of Chemistry journal article supplement (doi:10.1039/d1nj03697a), 2021-01-01
Supplement: d1nj03697a1.pdf [file d1nj03697a1.pdf]

## Selective **Nanomolar** Electrochemical Detection of Serotonin, Dopamine and Tryptophan Using $\text{TiO}_2/\text{RGO}/\text{CPE}$ - Influence of Reducing Agents

Teena Joseph<sup>1</sup>, Jasmine Thomas<sup>1</sup>, Tony Thomas<sup>2</sup>, Nygil Thomas<sup>1\*</sup>

### Supplementary information

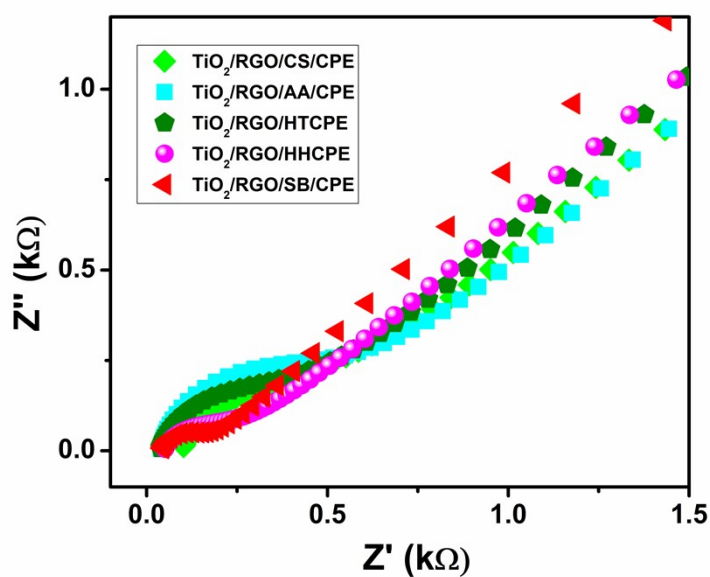

Figure S1: Nyquist plot of bare CPE and different  $\text{TiO}_2/\text{RGO}/\text{CPEs}$  (a); EIS parameters: OCP potential = 0.33 V, Perturbation Amplitude = 0.01 V, Linear frequency =  $3 \times 10^5 - 1 \times 10^2$  Hz. CVs of  $1 \times 10^{-4}$  M SER at bare CPE and different  $\text{TiO}_2/\text{RGO}/\text{CPEs}$  in 0.1 M PBS of pH 7.0 (b); Scan rate: 50 mV/s

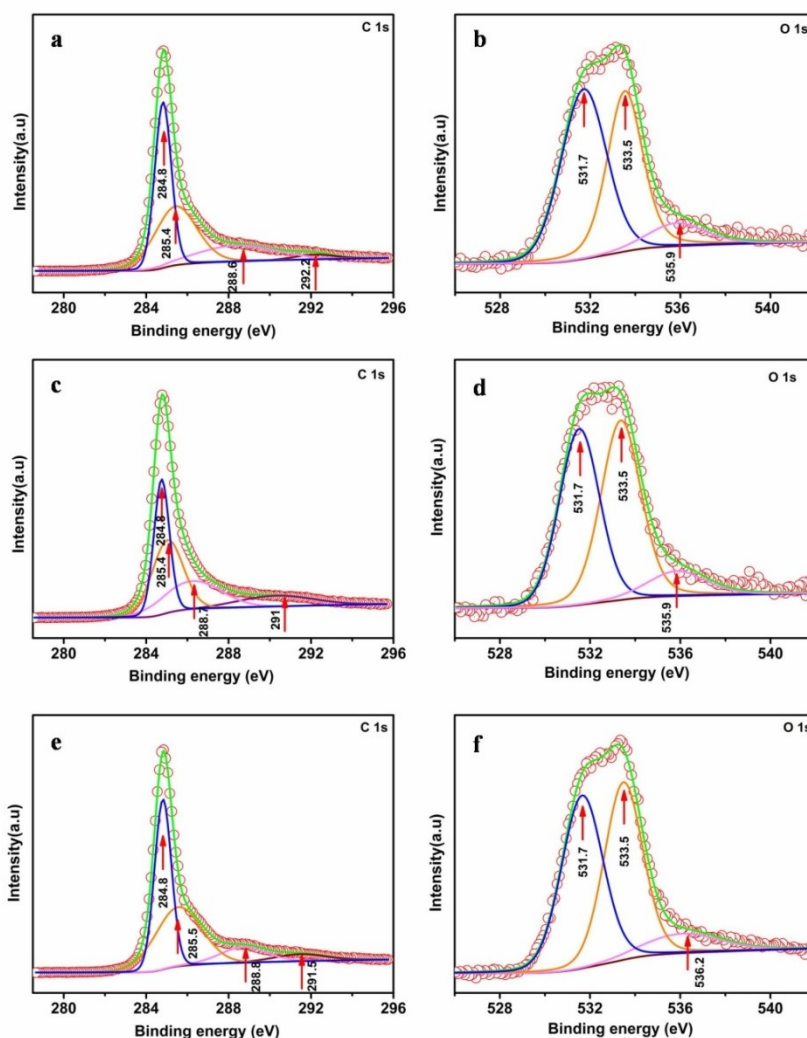

Figure S2: Deconvoluted C1s (a) and O1s (b) XPS spectra of RGSB, Deconvoluted C1s (c) and O1s (d) XPS spectra of RGHH and deconvoluted C1s (e) and O1s (f) XPS spectra of RGHT

| Electrode                | Anodic Peak Current ( $\mu\text{A}$ ) | Anodic peak Potential (V) |
|--------------------------|---------------------------------------|---------------------------|
| Bare CPE                 | 4.8                                   | 0.313                     |
| TiO <sub>2</sub> /RGO/AA | 6.8                                   | 0.301                     |
| TiO <sub>2</sub> /RGO/CS | 7.227                                 | 0.299                     |
| TiO <sub>2</sub> /RGO/HT | 8.398                                 | 0.304                     |
| TiO <sub>2</sub> /RGO/HH | 9.569                                 | 0.298                     |
| TiO <sub>2</sub> /RGO/SB | 9.904                                 | 0.296                     |

Table-T1: The anodic peak current and anodic peak potential of SER using different electrodes

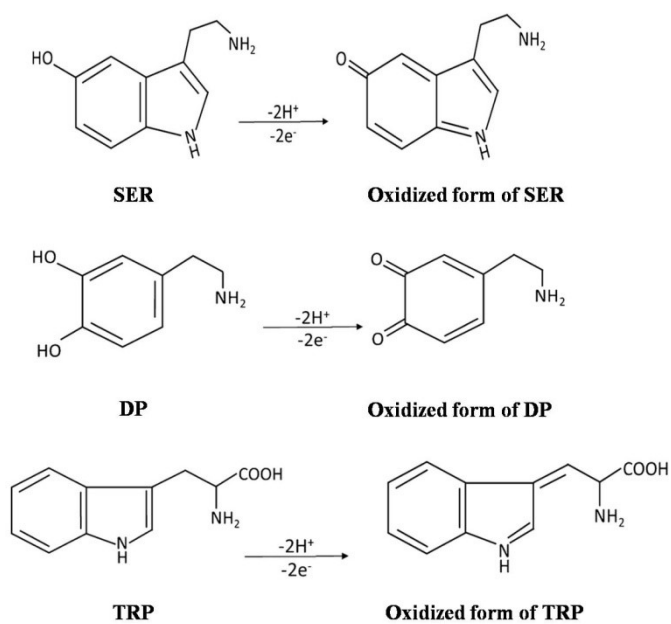

Scheme-1: Proposed electrochemical redox mechanism of SER, DP and TRP.

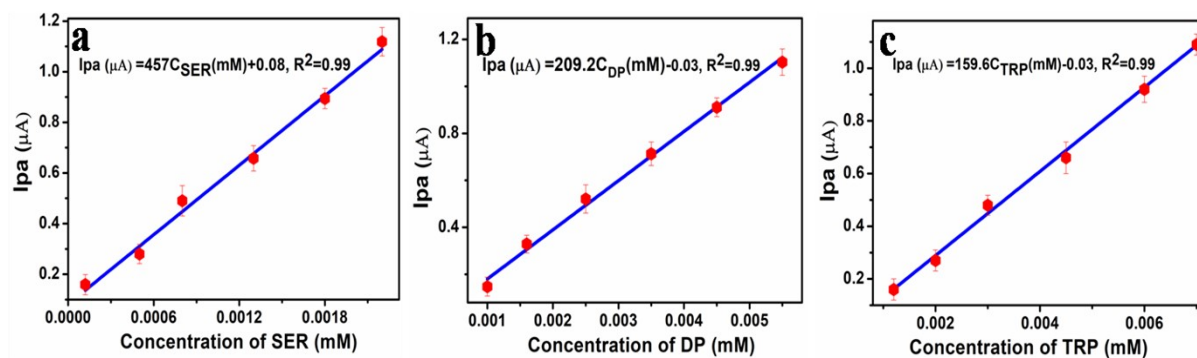

Figure S3: The plot of  $I_{pa}$  versus concentration of SER (a), DP (b) and TRP (c) in 0.1 M PBS of pH = 7.0 at  $TiO_2/RGO/SB/CPE$  in its mixture.

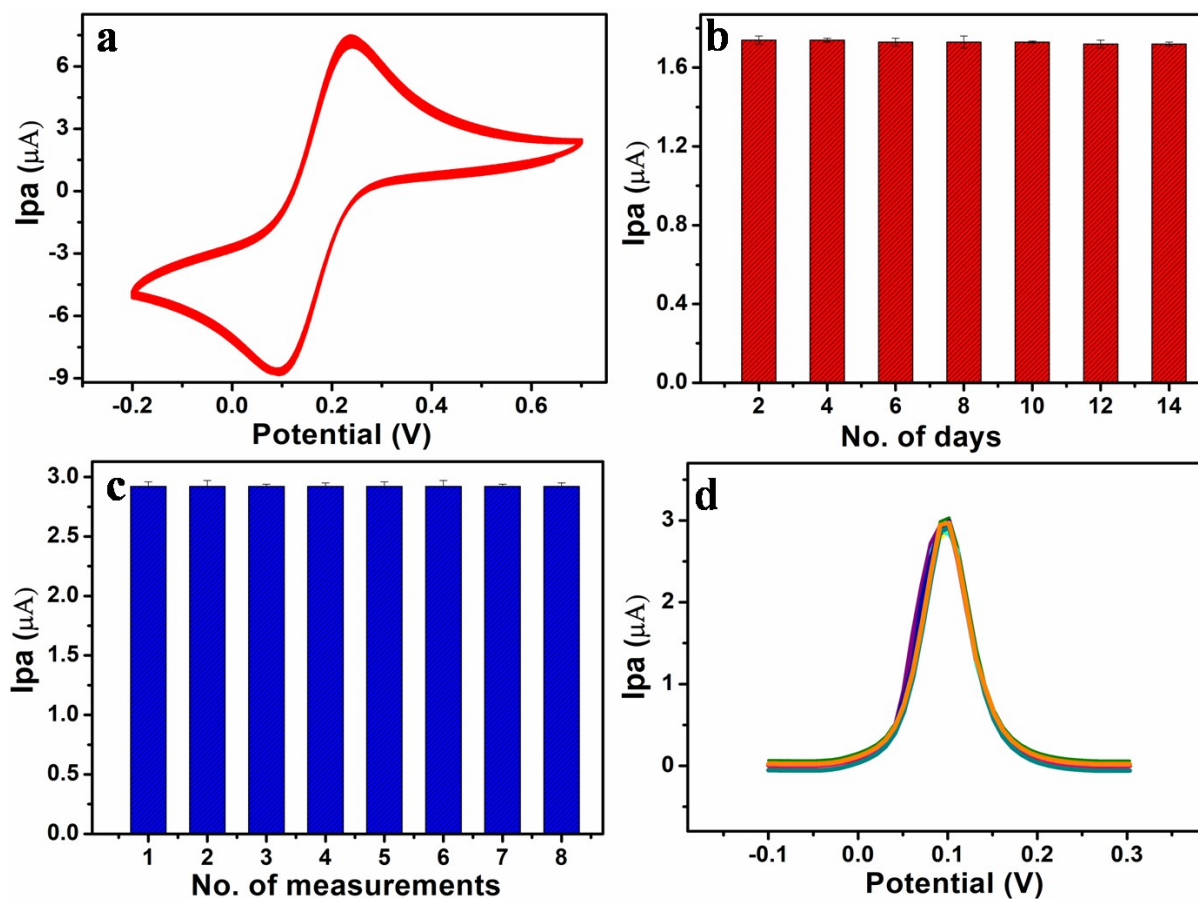

Figure S4: Stability and reproducibility results (a - d) at  $\text{TiO}_2/\text{RGO}/\text{SB}/\text{CPE}$ .
